# Supplementary material
Source: publisher site journal article supplement (https://www.spandidos-publications.com/1874/downloadSupplementary)
Supplement: Supplementary file 1 [file downloadSupplementary]

## Sheet: Supplementary table 1
Table SI. Definitions of gene abbreviations in Table II.
Gene Symbol	Gene Name
ABHD17A	abhydrolase domain containing 17A
AREG	amphiregulin
C5AR1	complement C5a receptor 1
CCR1	C-C motif chemokine receptor 1
CXCL2	C-X-C motif chemokine ligand 2
CXCL8	C-X-C motif chemokine ligand 8
EGR3	early growth response 3
HBEGF	heparin binding EGF like growth factor
IL1B	interleukin 1 beta
NAMPT	nicotinamide phosphoribosyltransferase
OSM	oncostatin M
PTGS2	prostaglandin-endoperoxide synthase 2
TNFRSF21	TNF receptor superfamily member 21
TRIB1	tribbles pseudokinase 1
